# Supplementary material for: Molecular evidence for natural hybridization between Rumex crispus and R. obtusifolius (Polygonaceae) in Korea
Source: PubMed Central journal article supplement (PMC8971494; doi:10.1038/s41598-022-09292-9), 2022-03-31
Supplement: 41598_2022_9292_MOESM1_ESM.pdf [file 41598_2022_9292_MOESM1_ESM.pdf]

**Supplementary Information for:**

**Molecular evidence for natural hybridization between *Rumex crispus* and *R. obtusifolius* (Polygonaceae) in Korea**

Gauri Shankar Bhandari, Chong-Wook Park\*

School of Biological Sciences, Seoul National University, Seoul 08826, Korea.

SI Correspondence to:

Chong-Wook Park, [parkc@snu.ac.kr](mailto:parkc@snu.ac.kr)

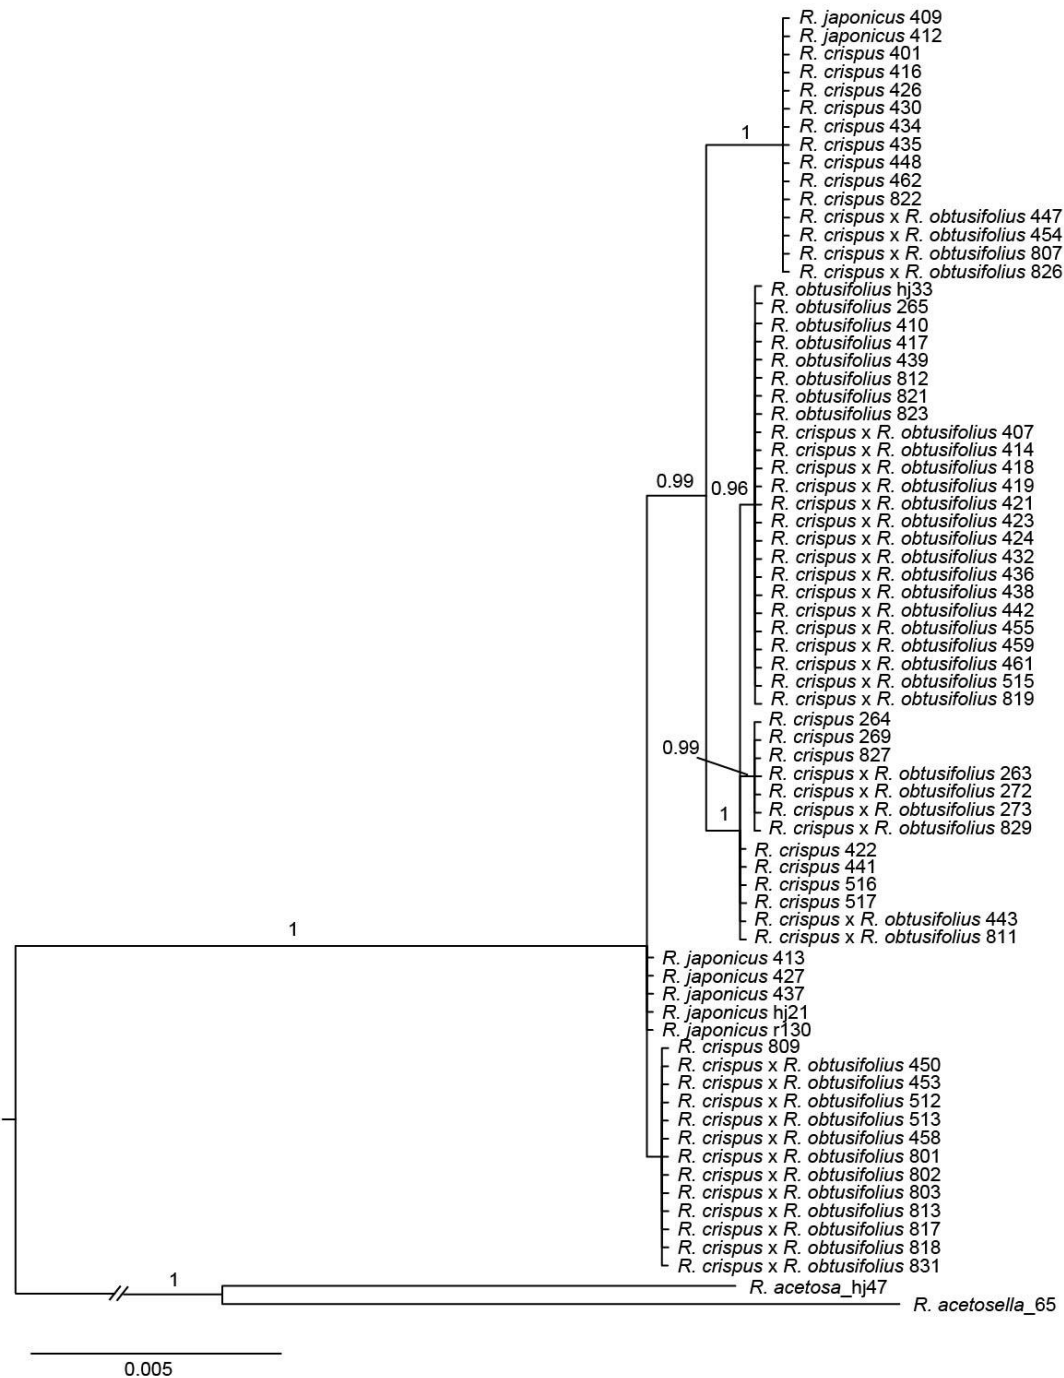

**Figure S1.** Bayesian majority-rule consensus tree of the combined cpDNA sequence data set for *Rumex crispus*, *R. obtusifolius*, *R. japonicus* and putative hybrids. Numbers above branches are Bayesian posterior probabilities (PP $\geq$ 0.7). Accession numbers correspond to those in Supplementary Table S1.

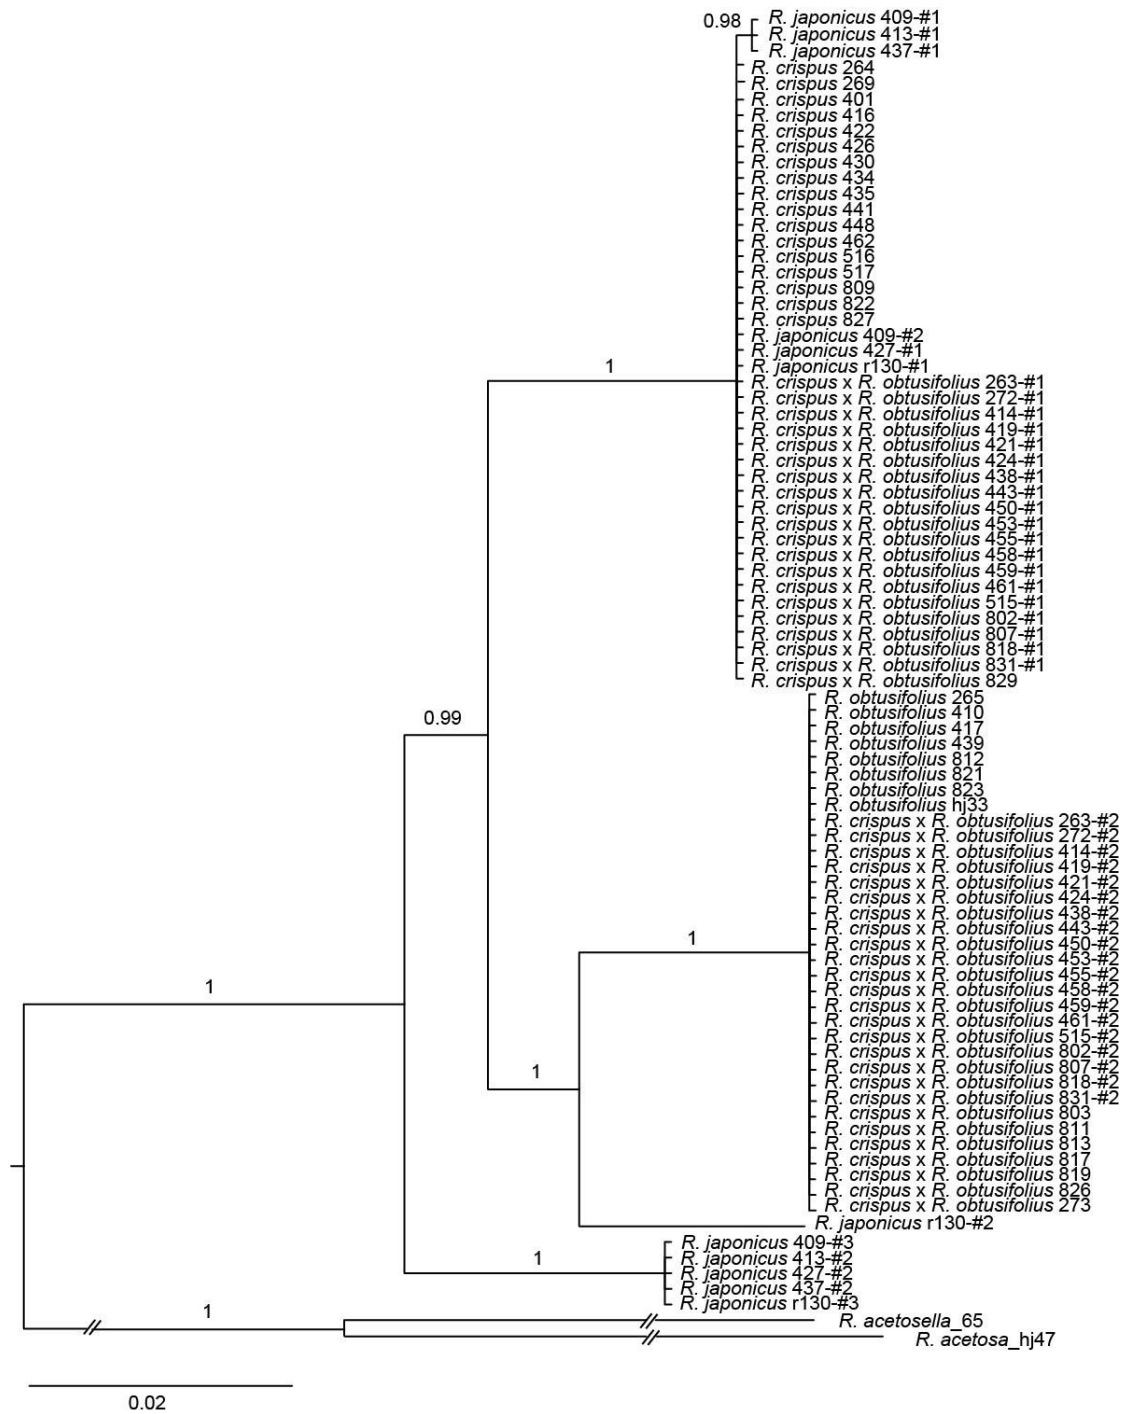

**Figure S2.** Bayesian majority-rule consensus tree of the nDNA *pgIC* sequence data set for *Rumex crispus*, *R. obtusifolius*, *R. japonicus* and putative hybrids. Numbers above branches are Bayesian posterior probabilities ( $PP \geq 0.7$ ). Accession numbers correspond to those in Supplementary Table S1.

**Table S1.** Collection data and GenBank accession numbers for 87 accessions of *Rumex crispus*, *R. obtusifolius*, *R. japonicus* and putative hybrids examined in this study (outgroup taxa included).

| Population                                 | Locality                 | Taxon                                      | Accession                                                           | cpDNA haplotype | GenBank accession number ( <i>matK</i> , <i>rbcL-accD</i> IGS, <i>trnK-rps16</i> IGS, <i>ycf6-psbM</i> IGS, <i>psbA-trnH</i> IGS, <i>pgiC</i> ). Missing <i>pgiC</i> sequences are indicated with a dash. |
|--------------------------------------------|--------------------------|--------------------------------------------|---------------------------------------------------------------------|-----------------|-----------------------------------------------------------------------------------------------------------------------------------------------------------------------------------------------------------|
| NS1                                        | Naesosa, Jeon-buk, Korea | <i>R. crispus</i>                          | 401                                                                 | C1              | OM927412, OM927646, OM927340, OM927484, OM927268, OM959623                                                                                                                                                |
|                                            |                          | <i>R. obtusifolius</i>                     | 410                                                                 | C2              | OM927440, OM927674, OM927368, OM927512, OM927296, OM927211                                                                                                                                                |
|                                            |                          | <i>R. japonicus</i>                        | 409                                                                 | C1              | OM927409, OM927643, OM927337, OM927481, OM927265, OM927183/OM927256/OM927261                                                                                                                              |
|                                            |                          | <i>R. crispus</i> x <i>R. obtusifolius</i> | 407                                                                 | C2              | OM927443, OM927677, OM927371, OM927515, OM927299, –                                                                                                                                                       |
|                                            |                          | <i>R. crispus</i> x <i>R. obtusifolius</i> | 801                                                                 | C5              | OM927429, OM927663, OM927357, OM927501, OM927285, –                                                                                                                                                       |
|                                            |                          | <i>R. crispus</i> x <i>R. obtusifolius</i> | 802                                                                 | C5              | OM927425, OM927659, OM927353, OM927497, OM927281, OM927204/OM927248                                                                                                                                       |
|                                            |                          | <i>R. crispus</i> x <i>R. obtusifolius</i> | 803                                                                 | C5              | OM927436, OM927670, OM927364, OM927508, OM927292, OM927206                                                                                                                                                |
| NS2                                        | Naesosa, Jeon-buk, Korea | <i>R. crispus</i>                          | 416                                                                 | C1              | OM927413, OM927647, OM927341, OM927485, OM927269, OM927219                                                                                                                                                |
|                                            |                          | <i>R. crispus</i>                          | 422                                                                 | C4              | OM927472, OM927706, OM927400, OM927544, OM927328, OM927220                                                                                                                                                |
|                                            |                          | <i>R. crispus</i>                          | 426                                                                 | C1              | OM927411, OM927645, OM927339, OM927483, OM927267, OM927221                                                                                                                                                |
|                                            |                          | <i>R. crispus</i>                          | 430                                                                 | C1              | OM927414, OM927648, OM927342, OM927486, OM927270, OM927222                                                                                                                                                |
|                                            |                          | <i>R. obtusifolius</i>                     | 417                                                                 | C2              | OM927453, OM927687, OM927381, OM927525, OM927309, OM927212                                                                                                                                                |
|                                            |                          | <i>R. japonicus</i>                        | 412                                                                 | C1              | OM927423, OM927657, OM927351, OM927495, OM927279, –                                                                                                                                                       |
|                                            |                          | <i>R. japonicus</i>                        | 413                                                                 | C6              | OM927478, OM927712, OM927406, OM927550, OM927334, OM927181/OM927258                                                                                                                                       |
|                                            |                          | <i>R. japonicus</i>                        | 427                                                                 | C6              | OM927475, OM927709, OM927403, OM927547, OM927331, OM927236/OM927259                                                                                                                                       |
|                                            |                          | <i>R. crispus</i> x <i>R. obtusifolius</i> | 414                                                                 | C2              | OM927460, OM927694, OM927388, OM927532, OM927316, OM927185/OM927232                                                                                                                                       |
|                                            |                          | <i>R. crispus</i> x <i>R. obtusifolius</i> | 418                                                                 | C2              | OM927444, OM927678, OM927372, OM927516, OM927300, –                                                                                                                                                       |
| <i>R. crispus</i> x <i>R. obtusifolius</i> | 419                      | C2                                         | OM927445, OM927679, OM927373, OM927517, OM927301, OM927186/OM927233 |                 |                                                                                                                                                                                                           |

**Table S1 (Continued).**

| Population                                 | Locality                 | Taxon                                      | Accession                                           | cpDNA haplotype | GenBank accession number ( <i>matK</i> , <i>rbcL-accD</i> IGS, <i>trnK-rps16</i> IGS, <i>ycf6-psbM</i> IGS, <i>psbA-trnH</i> IGS, <i>pgiC</i> ). Missing <i>pgiC</i> sequences are indicated with a dash. |
|--------------------------------------------|--------------------------|--------------------------------------------|-----------------------------------------------------|-----------------|-----------------------------------------------------------------------------------------------------------------------------------------------------------------------------------------------------------|
| NS2                                        | Naesosa, Jeon-buk, Korea | <i>R. crispus</i> x <i>R. obtusifolius</i> | 421                                                 | C2              | OM927457, OM927691, OM927385, OM927529, OM927313, OM927187/OM927234                                                                                                                                       |
|                                            |                          | <i>R. crispus</i> x <i>R. obtusifolius</i> | 423                                                 | C2              | OM927442, OM927676, OM927370, OM927514, OM927298, –                                                                                                                                                       |
|                                            |                          | <i>R. crispus</i> x <i>R. obtusifolius</i> | 424                                                 | C2              | OM927446, OM927680, OM927374, OM927518, OM927302, OM927188/OM927235                                                                                                                                       |
|                                            |                          | <i>R. crispus</i> x <i>R. obtusifolius</i> | 432                                                 | C2              | OM927447, OM927681, OM927375, OM927519, OM927303, –                                                                                                                                                       |
| NS3                                        | Naesosa, Jeon-buk, Korea | <i>R. crispus</i>                          | 434                                                 | C1              | OM927415, OM927649, OM927343, OM927487, OM927271, OM927223                                                                                                                                                |
|                                            |                          | <i>R. crispus</i>                          | 435                                                 | C1              | OM927416, OM927650, OM927344, OM927488, OM927272, OM927224                                                                                                                                                |
|                                            |                          | <i>R. japonicus</i>                        | 437                                                 | C6              | OM927476, OM927710, OM927404, OM927548, OM927332, OM927182/OM927260                                                                                                                                       |
|                                            |                          | <i>R. obtusifolius</i>                     | 439                                                 | C2              | OM927439, OM927673, OM927367, OM927511, OM927295, OM927213                                                                                                                                                |
|                                            |                          | <i>R. crispus</i> x <i>R. obtusifolius</i> | 436                                                 | C2              | OM927458, OM927692, OM927386, OM927530, OM927314, –                                                                                                                                                       |
|                                            |                          | <i>R. crispus</i> x <i>R. obtusifolius</i> | 438                                                 | C2              | OM927459, OM927693, OM927387, OM927531, OM927315, OM927189/OM927237                                                                                                                                       |
| NS4                                        | Naesosa, Jeon-buk, Korea | <i>R. crispus</i>                          | 809                                                 | C5              | OM927424, OM927658, OM927352, OM927496, OM927280, OM927231                                                                                                                                                |
|                                            |                          | <i>R. crispus</i>                          | 822                                                 | C1              | OM927422, OM927656, OM927350, OM927494, OM927278, OM927249                                                                                                                                                |
|                                            |                          | <i>R. crispus</i>                          | 516                                                 | C4              | OM927469, OM927703, OM927397, OM927541, OM927325, OM927250                                                                                                                                                |
|                                            |                          | <i>R. crispus</i>                          | 517                                                 | C4              | OM927471, OM927705, OM927399, OM927543, OM927327, OM927251                                                                                                                                                |
|                                            |                          | <i>R. crispus</i>                          | 441                                                 | C4              | OM927473, OM927707, OM927401, OM927545, OM927329, OM927225                                                                                                                                                |
|                                            |                          | <i>R. obtusifolius</i>                     | 823                                                 | C2              | OM927455, OM927689, OM927383, OM927527, OM927311, OM927216                                                                                                                                                |
|                                            |                          | <i>R. obtusifolius</i>                     | hj33                                                | C2              | OM927438, OM927672, OM927366, OM927510, OM927294, OM927217                                                                                                                                                |
|                                            |                          | <i>R. japonicus</i>                        | hj21                                                | C6              | OM927477, OM927711, OM927405, OM927549, OM927333, –                                                                                                                                                       |
|                                            |                          | <i>R. japonicus</i>                        | r130                                                | C6              | OM927474, OM927708, OM927402, OM927546, OM927330, OM927218/OM927257/OM927262                                                                                                                              |
| <i>R. crispus</i> x <i>R. obtusifolius</i> | 442                      | C2                                         | OM927448, OM927682, OM927376, OM927520, OM927304, – |                 |                                                                                                                                                                                                           |

**Table S1 (Continued).**

| Population | Locality                 | Taxon                                      | Accession | cpDNA haplotype | GenBank accession number ( <i>matK</i> , <i>rbcL-accD</i> IGS, <i>trnK-rps16</i> IGS, <i>ycf6-psbM</i> IGS, <i>psbA-trnH</i> IGS, <i>pgiC</i> ). Missing <i>pgiC</i> sequences are indicated with a dash. |
|------------|--------------------------|--------------------------------------------|-----------|-----------------|-----------------------------------------------------------------------------------------------------------------------------------------------------------------------------------------------------------|
| NS4        | Naesosa, Jeon-buk, Korea | <i>R. crispus</i> x <i>R. obtusifolius</i> | 442       | C2              | OM927448, OM927682, OM927376, OM927520, OM927304, –                                                                                                                                                       |
|            |                          | <i>R. crispus</i> x <i>R. obtusifolius</i> | 443       | C4              | OM927470, OM927704, OM927398, OM927542, OM927326, OM927190/OM927238                                                                                                                                       |
|            |                          | <i>R. crispus</i> x <i>R. obtusifolius</i> | 512       | C5              | OM927426, OM927660, OM927354, OM927498, OM927282, –                                                                                                                                                       |
|            |                          | <i>R. crispus</i> x <i>R. obtusifolius</i> | 515       | C2              | OM927452, OM927686, OM927380, OM927524, OM927308, OM927209/OM927255                                                                                                                                       |
|            |                          | <i>R. crispus</i> x <i>R. obtusifolius</i> | 513       | C5              | OM927427, OM927661, OM927355, OM927499, OM927283, –                                                                                                                                                       |
|            |                          | <i>R. crispus</i> x <i>R. obtusifolius</i> | 807       | C1              | OM927421, OM927655, OM927349, OM927493, OM927277, OM927208/OM927254                                                                                                                                       |
|            |                          | <i>R. crispus</i> x <i>R. obtusifolius</i> | 811       | C4              | OM927468, OM927702, OM927396, OM927540, OM927324, OM927199                                                                                                                                                |
|            |                          | <i>R. crispus</i> x <i>R. obtusifolius</i> | 813       | C5              | OM927435, OM927669, OM927363, OM927507, OM927291, OM927200                                                                                                                                                |
|            |                          | <i>R. crispus</i> x <i>R. obtusifolius</i> | 817       | C5              | OM927434, OM927668, OM927362, OM927506, OM927290, OM927201                                                                                                                                                |
|            |                          | <i>R. crispus</i> x <i>R. obtusifolius</i> | 818       | C5              | OM927428, OM927662, OM927356, OM927500, OM927284, OM927202/OM927247                                                                                                                                       |
|            |                          | <i>R. crispus</i>                          | 827       | C3              | OM927461, OM927695, OM927389, OM927533, OM927317, OM927230                                                                                                                                                |
|            |                          | <i>R. crispus</i> x <i>R. obtusifolius</i> | 829       | C3              | OM927462, OM927696, OM927390, OM927534, OM927318, OM927252                                                                                                                                                |
|            |                          | <i>R. crispus</i> x <i>R. obtusifolius</i> | 819       | C2              | OM927454, OM927688, OM927382, OM927526, OM927310, OM927203                                                                                                                                                |
| NS5        | Naesosa, Jeon-buk, Korea | <i>R. crispus</i>                          | 448       | C1              | OM927418, OM927652, OM927346, OM927490, OM927274, OM927226                                                                                                                                                |
|            |                          | <i>R. obtusifolius</i>                     | 821       | C2              | OM927437, OM927671, OM927365, OM927509, OM927293, OM927215                                                                                                                                                |
|            |                          | <i>R. crispus</i> x <i>R. obtusifolius</i> | 450       | C5              | OM927433, OM927667, OM927361, OM927505, OM927289, OM927191/OM927239                                                                                                                                       |
|            |                          | <i>R. crispus</i> x <i>R. obtusifolius</i> | 453       | C5              | OM927432, OM927666, OM927360, OM927504, OM927288, OM927192/OM927240                                                                                                                                       |
|            |                          | <i>R. crispus</i> x <i>R. obtusifolius</i> | 447       | C1              | OM927417, OM927651, OM927345, OM927489, OM927273, –                                                                                                                                                       |
|            |                          | <i>R. crispus</i> x <i>R. obtusifolius</i> | 454       | C1              | OM927419, OM927653, OM927347, OM927491, OM927275, –                                                                                                                                                       |

**Table S1 (Continued).**

| Population | Locality                 | Taxon                                      | Accession | cpDNA haplotype | GenBank accession number ( <i>matK</i> , <i>rbcL-accD</i> IGS, <i>trnK-rps16</i> IGS, <i>ycf6-psbM</i> IGS, <i>psbA-trnH</i> IGS, <i>pgiC</i> ). Missing <i>pgiC</i> sequences are indicated with a dash. |
|------------|--------------------------|--------------------------------------------|-----------|-----------------|-----------------------------------------------------------------------------------------------------------------------------------------------------------------------------------------------------------|
| NS5        | Naesosa, Jeon-buk, Korea | <i>R. crispus</i> x <i>R. obtusifolius</i> | 455       | C2              | OM927449, OM927683, OM927377, OM927521, OM927305, OM927193/OM927241                                                                                                                                       |
|            |                          | <i>R. crispus</i> x <i>R. obtusifolius</i> | 826       | C1              | OM927410, OM927644, OM927338, OM927482, OM927266, OM927205                                                                                                                                                |
| NS6        | Naesosa, Jeon-buk, Korea | <i>R. crispus</i>                          | 462       | C1              | OM927420, OM927654, OM927348, OM927492, OM927276, OM927227                                                                                                                                                |
|            |                          | <i>R. obtusifolius</i>                     | 812       | C2              | OM927456, OM927690, OM927384, OM927528, OM927312, OM927214                                                                                                                                                |
|            |                          | <i>R. crispus</i> x <i>R. obtusifolius</i> | 458       | C5              | OM927430, OM927664, OM927358, OM927502, OM927286, OM927194/OM927242                                                                                                                                       |
|            |                          | <i>R. crispus</i> x <i>R. obtusifolius</i> | 459       | C2              | OM927450, OM927684, OM927378, OM927522, OM927306, OM927195/OM927243                                                                                                                                       |
|            |                          | <i>R. crispus</i> x <i>R. obtusifolius</i> | 461       | C2              | OM927451, OM927685, OM927379, OM927523, OM927307, OM927196/OM927244                                                                                                                                       |
|            |                          | <i>R. crispus</i> x <i>R. obtusifolius</i> | 831       | C5              | OM927431, OM927665, OM927359, OM927503, OM927287, OM927207/OM927253                                                                                                                                       |
| GD1        | Gadeok-do, Busan, Korea  | <i>R. crispus</i>                          | 264       | C3              | OM927464, OM927698, OM927392, OM927536, OM927320, OM927228                                                                                                                                                |
|            |                          | <i>R. crispus</i>                          | 269       | C3              | OM927465, OM927699, OM927393, OM927537, OM927321, OM927229                                                                                                                                                |
|            |                          | <i>R. obtusifolius</i>                     | 265       | C2              | OM927441, OM927675, OM927369, OM927513, OM927297, OM927210                                                                                                                                                |
|            |                          | <i>R. crispus</i> x <i>R. obtusifolius</i> | 263       | C3              | OM927463, OM927697, OM927391, OM927535, OM927319, OM927197/OM927245                                                                                                                                       |
|            |                          | <i>R. crispus</i> x <i>R. obtusifolius</i> | 272       | C3              | OM927466, OM927700, OM927394, OM927538, OM927322, OM927198/OM927246                                                                                                                                       |
|            |                          | <i>R. crispus</i> x <i>R. obtusifolius</i> | 273       | C3              | OM927467, OM927701, OM927395, OM927539, OM927323, OM927184                                                                                                                                                |
| SW1        | Suwon, Korea             | <i>R. crispus</i>                          | 318       | C5              | OM927554, OM927569, OM927584, OM927599, OM927614, OM927635                                                                                                                                                |
|            |                          | <i>R. crispus</i>                          | 319       | C5              | OM927553, OM927568, OM927583, OM927598, OM927613, OM927634                                                                                                                                                |
|            |                          | <i>R. crispus</i>                          | 324       | C3              | OM927565, OM927580, OM927595, OM927610, OM927625, OM927640                                                                                                                                                |
| SW2        | Suwon, Korea             | <i>R. obtusifolius</i>                     | 006       | C2              | OM927560, OM927575, OM927590, OM927605, OM927620, OM927630                                                                                                                                                |

**Table S1 (Continued).**

| Population | Locality                            | Taxon                  | Accession | cpDNA haplotype | GenBank accession number ( <i>matK</i> , <i>rbcl-accD</i> IGS, <i>trnK-rps16</i> IGS, <i>ycf6-psbM</i> IGS, <i>psbA-trnH</i> IGS, <i>pgiC</i> ). Missing <i>pgiC</i> sequences are indicated with a dash. |
|------------|-------------------------------------|------------------------|-----------|-----------------|-----------------------------------------------------------------------------------------------------------------------------------------------------------------------------------------------------------|
| SH1        | Siheung,<br>Gyeonggi,<br>Korea      | <i>R. crispus</i>      | 910       | C5              | OM927556, OM927571, OM927586, OM927601, OM927616, OM927637                                                                                                                                                |
|            |                                     | <i>R. crispus</i>      | 911       | C5              | OM927555, OM927571, OM927586, OM927601, OM927616, OM927637                                                                                                                                                |
|            |                                     | <i>R. crispus</i>      | 934       | C5              | OM927557, OM927572, OM927587, OM927602, OM927617, OM927638                                                                                                                                                |
| SE1        | Seoul, Korea                        | <i>R. obtusifolius</i> | 007       | C2              | OM927561, OM927576, OM927591, OM927606, OM927621, OM927631                                                                                                                                                |
| NY1        | Namyang-ju,<br>Gyeonggi,<br>Korea   | <i>R. crispus</i>      | 207       | C3              | OM927564, OM927579, OM927594, OM927609, OM927624, OM927639                                                                                                                                                |
| WD1        | Wan-do,<br>Jeon-nam,<br>Korea       | <i>R. crispus</i>      | 122       | C5              | OM927567, OM927582, OM927597, OM927612, OM927627, OM927642                                                                                                                                                |
| NG1        | Gyeong-<br>nam, Korea               | <i>R. crispus</i>      | hj26      | C4              | OM927566, OM927581, OM927596, OM927611, OM927626, OM927641                                                                                                                                                |
| JS1        | Jeon-nam,<br>Korea                  | <i>R. obtusifolius</i> | 001       | C2              | OM927558, OM927573, OM927588, OM927603, OM927618, OM927628                                                                                                                                                |
| NR1        | Ulleung-do,<br>Gyeong-buk<br>Korea  | <i>R. obtusifolius</i> | 002       | C2              | OM927559, OM927574, OM927589, OM927604, OM927619, OM927629                                                                                                                                                |
| NR2        | Ulleung-do,<br>Gyeong-buk,<br>Korea | <i>R. obtusifolius</i> | 011       | C2              | OM927562, OM927577, OM927592, OM927607, OM927622, OM927632                                                                                                                                                |
|            |                                     | <i>R. obtusifolius</i> | 012       | C2              | OM927563, OM927578, OM927593, OM927608, OM927623, OM927633                                                                                                                                                |
| Outgroup   | Wando,<br>Jeon-nam,<br>Korea        | <i>R. acetosa</i>      | hj47      |                 | OM927480, OM927714, OM927408, OM927552, OM927336, OM927263                                                                                                                                                |
| Outgroup   | Seoul, Korea                        | <i>R. acetosella</i>   | 65        |                 | OM927479, OM927713, OM927407, OM927551, OM927335, OM927264                                                                                                                                                |
